# Supplementary material for: Knowledge, Attitude, and Practices towards Plastic Pollution among Malaysians
Source: Preprints.org preprint supplement (doi:10.20944/preprints202209.0315.v1), 2022-09-21
Supplement: Supplementary file 1 [file supplementary]

**Table S4**. Frequency distribution of respondents’ responses on practice-related questions towards plastic pollution.

| Variables | Frequency (n = 294) | Percentage (%) |
| --- | --- | --- |
| Do you separate plastic waste from other household wastes? | | |
| Yes | 98 | 33.3 |
| No | 91 | 31.0 |
| Sometimes | 105 | 35.7 |
| Do you recycle your plastic waste at home? | | |
| Yes | 151 | 51.4 |
| No | 67 | 22.8 |
| Sometimes | 76 | 25.9 |
| Do you use reusable bag(s) during groceries shopping? | | |
| Yes | 199 | 67.7 |
| No | 13 | 4.4 |
| Sometimes | 82 | 27.9 |
| Do you bring and use reusable container(s) to takeaway food or drinks? | | |
| Yes | 139 | 47.3 |
| No | 27 | 9.2 |
| Sometimes | 108 | 36.7 |
| Do you frequently purchase plastic-made product(s) or plastic-packaged product(s)? | | |
| Yes | 122 | 41.5 |
| No | 35 | 11.9 |
| Sometimes | 137 | 46.6 |
| Do you participate in plastic pollution related awareness creation campaigns? | | |
| Yes | 58 | 19.7 |
| No | 153 | 52.0 |
| Sometimes | 83 | 28.2 |
